# Supplementary material
Source: publisher figshare collection journal article supplement (https://acs.figshare.com/ndownloader/files/4023076)
Supplement: Supplementary file 1 [file 4023076]

# A Versatile Three-Dimensional Virus-Based Template for Dye-Sensitized Solar Cells with Improved Electron Transport and Light Harvesting

*Po-Yen Chen<sup>†,§</sup>, Xiangnan Dang<sup>§,†</sup>, Matthew T. Klug<sup>§,□</sup>, Jifa Qi<sup>§,†</sup>, Fred J. Burpo<sup>±, §,†</sup>, Noémie-Manuelle D. Courchesne<sup>†,§</sup>, Nicholas Fang<sup>□</sup>, Paula T. Hammond<sup>†,§,\*</sup>, Angela M. Belcher<sup>§,†,±,\*</sup>*

<sup>†</sup>Department of Chemical Engineering, Massachusetts Institute of Technology,  
Cambridge, MA 02139 (USA)

<sup>§</sup>The David H. Koch Institute for Integrative Cancer Research, Massachusetts Institute of  
Technology, Cambridge, MA 02139 (USA)

<sup>‡</sup>Department of Materials Science and Engineering, Massachusetts Institute of  
Technology, Cambridge, MA 02139 (USA)

<sup>□</sup>Department of Mechanical Engineering, Massachusetts Institute of Technology,  
Cambridge, MA 02139 (USA)

<sup>±</sup>Department of Biological Engineering, Massachusetts Institute of Technology,  
Cambridge, MA 02139 (USA)

\* Address correspondence to hammond@mit.edu and belcher@mit.edu

## Supplementary Information

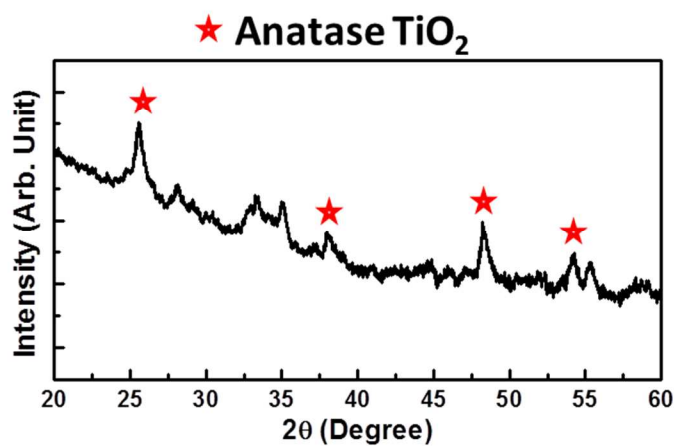

**Figure S1.** XRD analysis of the TiO<sub>2</sub> nanocrystallites after the hydrolysis of TiCl<sub>4</sub>.

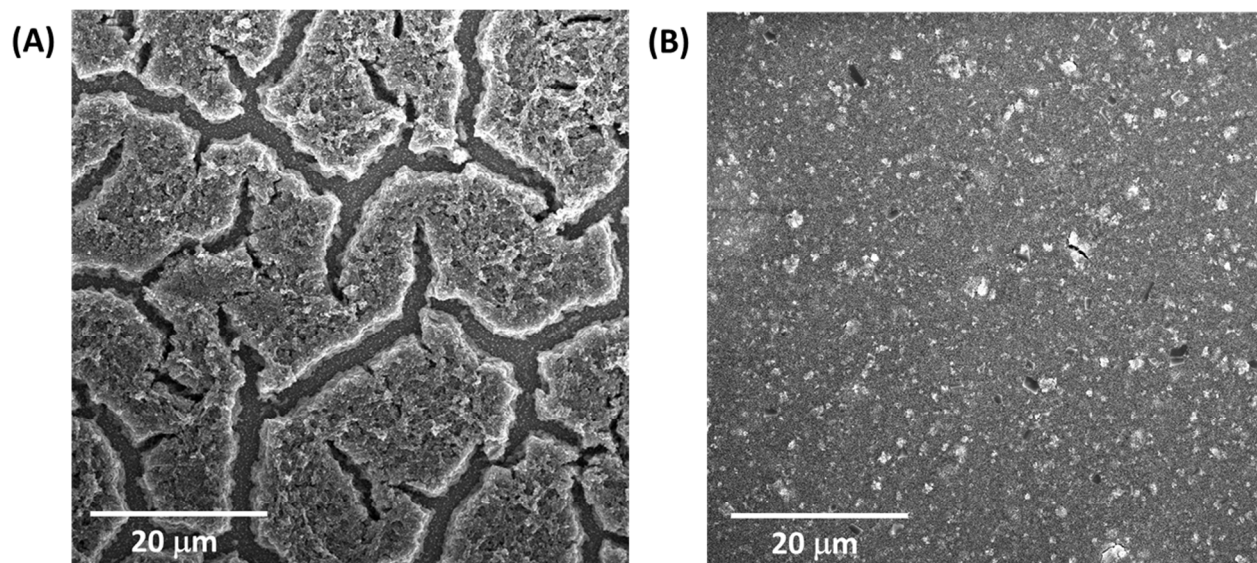

**Figure S2.** SEM images of the annealed virus-templated photoanodes (A) without (B) with the TiO<sub>2</sub> nucleation by (NH<sub>4</sub>)<sub>2</sub>TiF<sub>6</sub>/H<sub>3</sub>BO<sub>3</sub> solution.

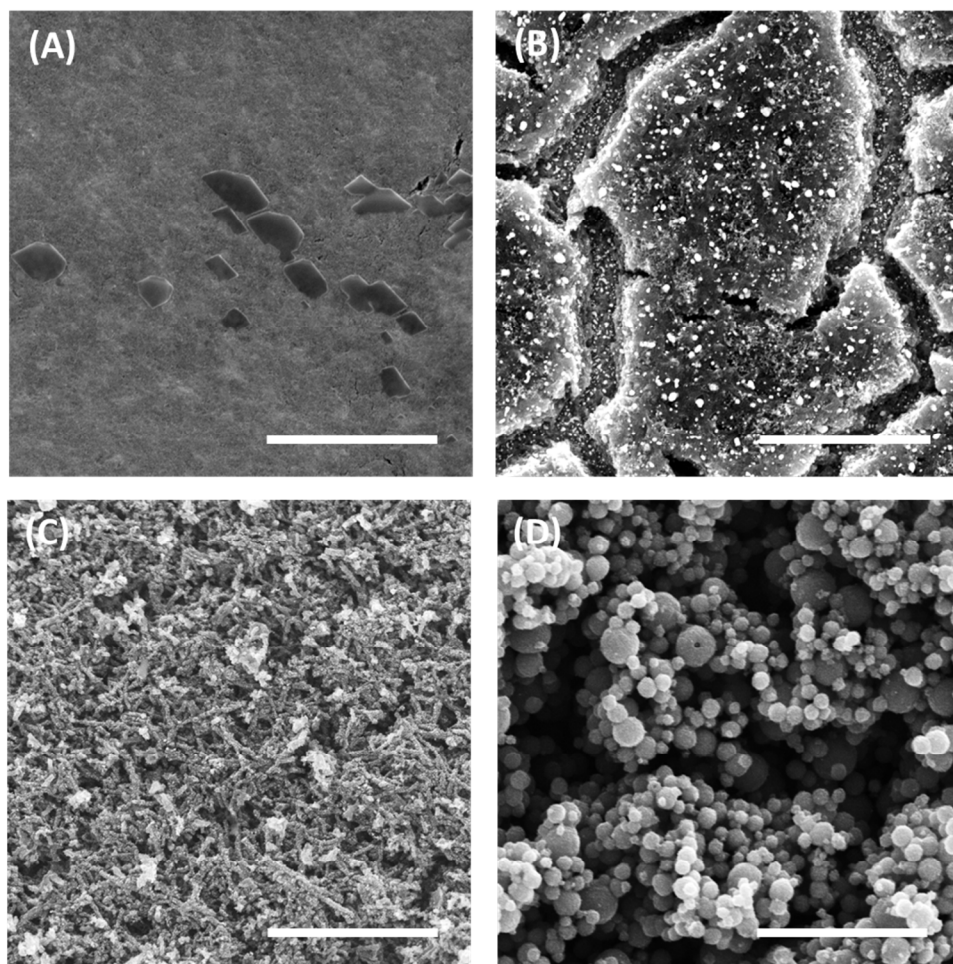

**Figure S3.** SEM images of the annealed virus-templated photoanodes nucleated in different concentration of the  $\text{TiCl}_4$  solution. (A) 0.04 M. (B) 0.1 M. (C) 0.2 M. (D) 0.4 M. All of the films are also nucleated with  $(\text{NH}_4)_2\text{TiF}_6/\text{H}_3\text{BO}_3$  solution subsequently. The scale bar is 4  $\mu\text{m}$ .

### Calculation of Diffusion Length ( $L_n$ ) from Electrochemical Impedance Spectra (EIS)

The electron diffusion length,  $L_n$ , can be calculated from  $L_n = L \times (R_{\text{REC}}/R_{\text{T}})^{1/2}$ , where  $L$  is the film thickness,  $R_{\text{REC}}$  is electron recombination resistance, and  $R_{\text{T}}$  is electron transport resistance.  $R_{\text{REC}}$  and  $R_{\text{T}}$  were obtained by fitting the measured electrochemical impedance spectra to the transmission line model (shown in **Figure S5**) with the Z-view software (v3.2b, Scribner Associates Inc). The transmission line component ( $Z_{\text{TiO}_2}$  in **Figure S5**) in an equivalent circuit is often used to represent the interface resistance and capacitance for a porous structure, which is the case for the photoanodes of DSSCs. During fitting the electrochemical impedance spectra to the transmission line model, the resistance and capacitance at the substrate/ $\text{TiO}_2$  interface, and the substrate/electrolyte interface were assumed negligible due to good contact between substrate and  $\text{TiO}_2$  and blocking layer of  $\text{TiO}_2$ . In **Figure S4**, electrochemical impedance spectra from each of three types of DSSCs, measured at 625 mV, are shown in symbols. The fitted results are shown as solid lines. For more detailed information about fitting electrochemical impedance spectra to the transmission line model and extracting electron diffusion length from fitted electrochemical impedance spectra, refer references.<sup>1-5</sup>

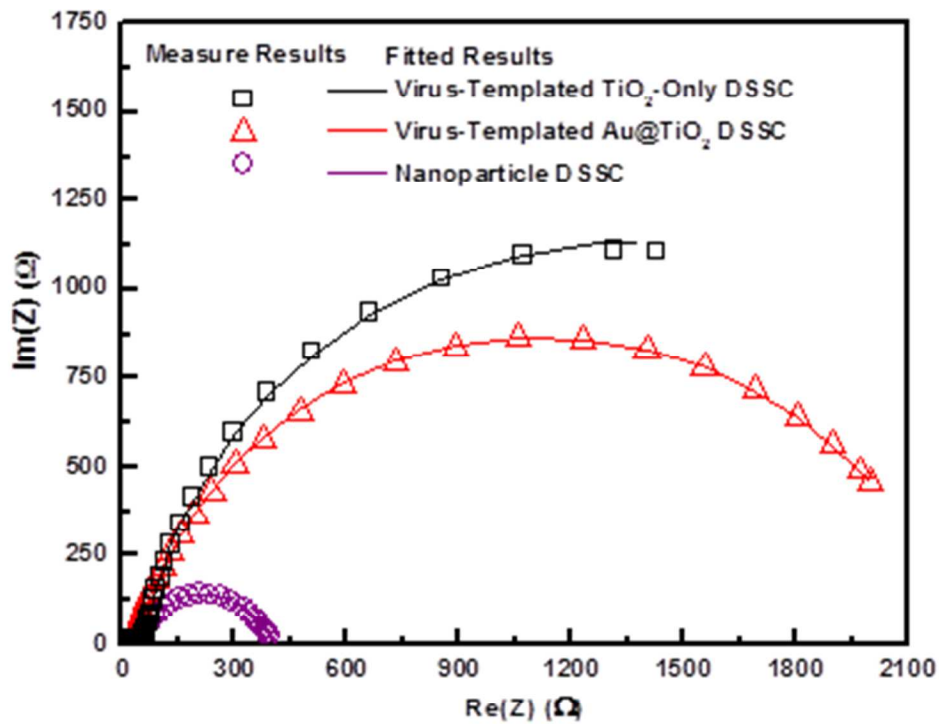

**Figure S4.** Nyquist diagrams of the EIS obtained under dark condition for different devices at 625 mV. Both data and fitted lines are shown.

Experimental data are presented by symbols, and fitted results using the equivalent circuit in **Figure S4** are shown as solid lines. The bias applied to all the devices during measurement is 625 mV. For the virus-templated TiO<sub>2</sub>-only DSSCs,  $R_{\text{REC}} = 2212.2$ ,  $R_{\text{T}} = 31.4$ , thus  $L_{\text{n}}/L = 8.4$ ; for the virus-templated Au@TiO<sub>2</sub> DSSCs,  $R_{\text{REC}} = 2646.9$ ,  $R_{\text{T}} = 51.9$ , thus  $L_{\text{n}}/L = 7.1$ ; for nanoparticle DSSCs,  $R_{\text{REC}} = 330$ ,  $R_{\text{T}} = 105$ , thus  $L_{\text{n}}/L = 1.8$ .

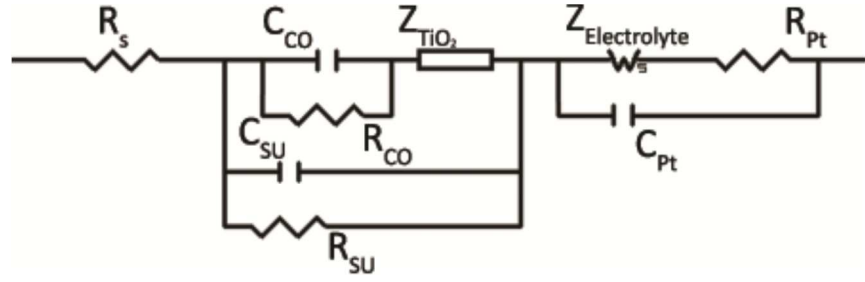

**Figure S5.** Equivalent circuit impedance model (transmission model) of DSSCs.  $R_s$ : Ohmic series resistance of the cell.  $R_{CO}$  and  $C_{CO}$ : Contact resistance and capacitance at the interface between the conducting substrate and the  $\text{TiO}_2$  photoanode film.  $R_{SU}$  and  $C_{SU}$ : Charge transfer resistance and double layer capacitance at the substrate/electrolyte interface.  $R_{Pt}$  and  $C_{Pt}$ : Charge transfer resistance and double layer capacitance at the counter electrode-electrolyte interface.  $Z_{\text{TiO}_2}$ : transmission line impedance of the  $\text{TiO}_2$  photoanode film consisting of the elements  $R_T$  (resistivity of electron transport in the photoanode film),  $R_{\text{REC}}$  (charge recombination resistance at the  $\text{TiO}_2$ /dye/electrolyte interface), and  $C_\mu$  (chemical capacitance of the photoanode film).  $Z_{\text{Electrolyte}}$ : mass transport impedance at the counter electrode.

### Calculation of Electron Collection Efficiency ( $\eta_{\text{COL}}$ ) from Electron Diffusion Length ( $L_n/L$ )

The electron collection efficiency is,<sup>3</sup>:

$$\eta_{\text{COL}} = \frac{\left[ -L\alpha \cosh\left(\frac{d}{L}\right) + \sinh\left(\frac{d}{L}\right) + L\alpha e^{-\alpha d} \right] L\alpha}{(1 - e^{-\alpha d}) \cdot [1 - L^2 \alpha^2] \cosh\left(\frac{d}{L}\right)}$$

where  $d$  is the thickness of the  $\text{TiO}_2$  film,  $L$  is the electron diffusion length, and  $\alpha$  is the extinction coefficient of dye sensitized  $\text{TiO}_2$  film. (The notation is different from that we

used in the manuscript: we used  $L$  for the thickness of the  $\text{TiO}_2$  film and  $L_n$  for the electron diffusion length.) For the calculation, we assume  $\alpha d$  equals to 1, indicating 90% of the incident light is absorbed. For the virus-templated  $\text{TiO}_2$ -only DSSCs,  $L/d = 8.4$ ,  $\eta_{\text{COL}} = 99.6\%$ ; for the virus-templated  $\text{Au@TiO}_2$  DSSCs,  $L/d = 7.1$ ,  $\eta_{\text{COL}} = 99.4\%$ ; for nanoparticle DSSCs,  $L/d = 1.8$ ,  $\eta_{\text{COL}} = 92.0\%$  (all  $L/d$  values were taken at a bias value of 625 mV, as shown in **Figure 4(A)** and **Table 1**).

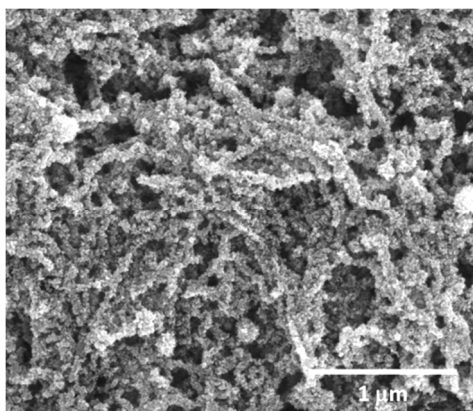

**Figure S6.** SEM image of the annealed virus-templated  $\text{Au@TiO}_2$  photoanodes.

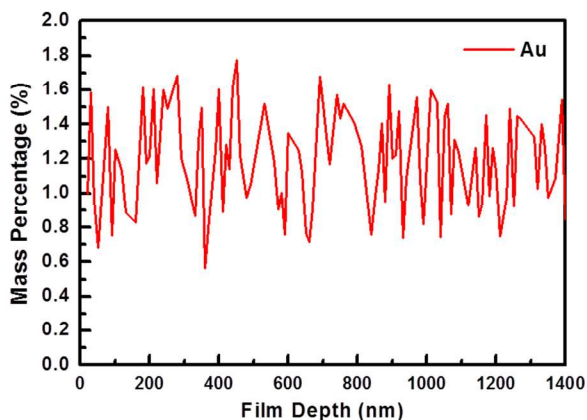

**Figure S7.** XPS measurement of the  $\text{Au@TiO}_2$  virus-templated photoanode. The average concentration of AuNPs in the photoanodes is 1.03 wt%.



## Supplementary References

1. Bisquert, J.; Fabregat-Santiago, F.; Mora-Seró, I. n.; Garcia-Belmonte, G.; Giménez, S., Electron Lifetime in Dye-Sensitized Solar Cells: Theory and Interpretation of Measurements. *J. Phys. Chem. C* **2009**, *113*, 17278-17290.
2. Bisquert, J.; Garcia-Belmonte, G.; Fabregat-Santiago, F.; Ferriols, N. S.; Bogdanoff, P.; Pereira, E. C., Doubling Exponent Models for the Analysis of Porous Film Electrodes by Impedance. Relaxation of TiO<sub>2</sub> Nanoporous in Aqueous Solution. *J. Phys. Chem. B* **2000**, *104*, 2287-2298.
3. Halme, J.; Vahermaa, P.; Miettunen, K.; Lund, P., Device Physics of Dye Solar Cells. *Adv. Mater.* **2010**, *22*, E210-E234.
4. Wang, M.; Chen, P.; Humphry-Baker, R.; Zakeeruddin, S. M.; Grätzel, M., The Influence of Charge Transport and Recombination on the Performance of Dye-Sensitized Solar Cells. *ChemPhysChem* **2009**, *10*, 290-299.
5. Wang, Q.; Ito, S.; Grätzel, M.; Fabregat-Santiago, F.; Mora-Seró, I.; Bisquert, J.; Bessho, T.; Imai, H., Characteristics of High Efficiency Dye-Sensitized Solar Cells. *J. Phys. Chem. B* **2006**, *110*, 25210-25221.
